# Supplementary material for: Plant-Based Only: Investigating Consumers’ Sensory Perception, Motivation, and Knowledge of Different Plant-Based Alternative Products on the Market
Source: MDPI journal article supplement (doi:10.3390/foods11152339), 2022-08-05
Supplement: s1 [file s1]

### Product 1

If the attribute does not apply to the sample at hand, please tick **NO**.

Please take a good look at the sample first before you evaluate this.

☐ No ☐ Yes

☐ No ☐ Yes

☐ No ☐ Yes

Now please hold the sample about 2cm under your nose and sniff it at least 3 times

○ Very little applicable      ○ Hardly applicable      ○ Neither      ○ Slightly applicable      ○ Very applicable

○ Very little applicable      ○ Hardly applicable      ○ Neither      ○ Slightly applicable      ○ Very applicable

○ Very little applicable      ○ Hardly applicable      ○ Neither      ○ Slightly applicable      ○ Very applicable

**Flavor: bitter** ☐ No ☐ Yes

**Flavor: cereal**

○ Very little applicable      ○ Hardly applicable      ○ Neither      ○ Slightly applicable      ○ Very applicable

**Flavor: nutty**                      ☐ No                      ☐ Yes

○ Very little applicable      ○ Hardly applicable      ○ Neither      ○ Slightly applicable      ○ Very applicable

**Flavor: sour**                      ☐ No                      ☐ Yes

○ Very little applicable      ○ Hardly applicable      ○ Neither      ○ Slightly applicable      ○ Very applicable

**Flavor: sweet**                      ☐ No                      ☐ Yes

○ Very little applicable      ○ Hardly applicable      ○ Neither      ○ Slightly applicable      ○ Very applicable

**Texture/mouthfeel: astringent  
(dry contraction, harsh)**

☐ No ☐ Yes

○ Very little applicable      ○ Hardly applicable      ○ Neither      ○ Slightly applicable      ○ Very applicable

**Texture/mouthfeel: viscous**      ☐ No                      ☐ Yes

○ Very little applicable      ○ Hardly applicable      ○ Neither      ○ Slightly applicable      ○ Very applicable

**Texture/mouthfeel: oily**      ☐ No      ☐ Yes

○ Very little applicable      ○ Hardly applicable      ○ Neither      ○ Slightly applicable      ○ Very applicable

Now evaluate the overall liking for the sample

[illegible]

Please neutralize your senses with **Matzen® and water!**

I can not taste the sample or only partially because:

## Product 2

Select all attributes from the list below that characterize the sample at hand.

If the attribute does not apply to the sample at hand, please tick **NO**.

If the attribute applies to the sample at hand, please check **YES** and rate on the scale how much it applies.

Please take a good look at the sample first before you evaluate this.

- |                                              |                       |                   |                       |         |                       |                     |                       |                 |
|----------------------------------------------|-----------------------|-------------------|-----------------------|---------|-----------------------|---------------------|-----------------------|-----------------|
| <b>Appearance: yellow color</b>              | <input type="radio"/> | No                | <input type="radio"/> | Yes     |                       |                     |                       |                 |
| <input type="radio"/> Very little applicable | <input type="radio"/> | Hardly applicable | <input type="radio"/> | Neither | <input type="radio"/> | Slightly applicable | <input type="radio"/> | Very applicable |
| <b>Appearance: glossy</b>                    | <input type="radio"/> | No                | <input type="radio"/> | Yes     |                       |                     |                       |                 |
| <input type="radio"/> Very little applicable | <input type="radio"/> | Hardly applicable | <input type="radio"/> | Neither | <input type="radio"/> | Slightly applicable | <input type="radio"/> | Very applicable |

Now please hold the sample about 2cm under your nose and sniff it at least 3 times

- |                                              |                       |                   |                       |         |                       |                     |                       |                 |
|----------------------------------------------|-----------------------|-------------------|-----------------------|---------|-----------------------|---------------------|-----------------------|-----------------|
| <b>Odor: cheesy (typical for Gouda)</b>      | <input type="radio"/> | No                | <input type="radio"/> | Yes     |                       |                     |                       |                 |
| <input type="radio"/> Very little applicable | <input type="radio"/> | Hardly applicable | <input type="radio"/> | Neither | <input type="radio"/> | Slightly applicable | <input type="radio"/> | Very applicable |
| <b>Odor: nutty</b>                           | <input type="radio"/> | No                | <input type="radio"/> | Yes     |                       |                     |                       |                 |
| <input type="radio"/> Very little applicable | <input type="radio"/> | Hardly applicable | <input type="radio"/> | Neither | <input type="radio"/> | Slightly applicable | <input type="radio"/> | Very applicable |
| <b>Odor: sourly</b>                          | <input type="radio"/> | No                | <input type="radio"/> | Yes     |                       |                     |                       |                 |
| <input type="radio"/> Very little applicable | <input type="radio"/> | Hardly applicable | <input type="radio"/> | Neither | <input type="radio"/> | Slightly applicable | <input type="radio"/> | Very applicable |
| <b>Odor: brothy/spicy</b>                    | <input type="radio"/> | No                | <input type="radio"/> | Yes     |                       |                     |                       |                 |
| <input type="radio"/> Very little applicable | <input type="radio"/> | Hardly applicable | <input type="radio"/> | Neither | <input type="radio"/> | Slightly applicable | <input type="radio"/> | Very applicable |

Please taste now the present sample and evaluate the following attributes.

- |                                              |                       |                   |                       |         |                       |                     |                       |                 |
|----------------------------------------------|-----------------------|-------------------|-----------------------|---------|-----------------------|---------------------|-----------------------|-----------------|
| <b>Flavor: cereal</b>                        | <input type="radio"/> | No                | <input type="radio"/> | Yes     |                       |                     |                       |                 |
| <input type="radio"/> Very little applicable | <input type="radio"/> | Hardly applicable | <input type="radio"/> | Neither | <input type="radio"/> | Slightly applicable | <input type="radio"/> | Very applicable |
| <b>Flavor: cheesy (typical for Gouda)</b>    | <input type="radio"/> | No                | <input type="radio"/> | Yes     |                       |                     |                       |                 |
| <input type="radio"/> Very little applicable | <input type="radio"/> | Hardly applicable | <input type="radio"/> | Neither | <input type="radio"/> | Slightly applicable | <input type="radio"/> | Very applicable |
| <b>Flavor: milky</b>                         | <input type="radio"/> | No                | <input type="radio"/> | Yes     |                       |                     |                       |                 |
| <input type="radio"/> Very little applicable | <input type="radio"/> | Hardly applicable | <input type="radio"/> | Neither | <input type="radio"/> | Slightly applicable | <input type="radio"/> | Very applicable |
| <b>Flavor: salty</b>                         | <input type="radio"/> | No                | <input type="radio"/> | Yes     |                       |                     |                       |                 |
| <input type="radio"/> Very little applicable | <input type="radio"/> | Hardly applicable | <input type="radio"/> | Neither | <input type="radio"/> | Slightly applicable | <input type="radio"/> | Very applicable |
| <b>Flavor: sweet</b>                         | <input type="radio"/> | No                | <input type="radio"/> | Yes     |                       |                     |                       |                 |
| <input type="radio"/> Very little applicable | <input type="radio"/> | Hardly applicable | <input type="radio"/> | Neither | <input type="radio"/> | Slightly applicable | <input type="radio"/> | Very applicable |
| <b>Flavor: umami (savory, hearty)</b>        | <input type="radio"/> | No                | <input type="radio"/> | Yes     |                       |                     |                       |                 |
| <input type="radio"/> Very little applicable | <input type="radio"/> | Hardly applicable | <input type="radio"/> | Neither | <input type="radio"/> | Slightly applicable | <input type="radio"/> | Very applicable |
| <b>Texture/mouthfeel: creamy, soft</b>       | <input type="radio"/> | No                | <input type="radio"/> | Yes     |                       |                     |                       |                 |
| <input type="radio"/> Very little applicable | <input type="radio"/> | Hardly applicable | <input type="radio"/> | Neither | <input type="radio"/> | Slightly applicable | <input type="radio"/> | Very applicable |
| <b>Texture/mouthfeel: juicy, moist</b>       | <input type="radio"/> | No                | <input type="radio"/> | Yes     |                       |                     |                       |                 |
| <input type="radio"/> Very little applicable | <input type="radio"/> | Hardly applicable | <input type="radio"/> | Neither | <input type="radio"/> | Slightly applicable | <input type="radio"/> | Very applicable |

|                                                |                                         |                               |                                           |                                       |                       |                       |                       |                       |                       |
|------------------------------------------------|-----------------------------------------|-------------------------------|-------------------------------------------|---------------------------------------|-----------------------|-----------------------|-----------------------|-----------------------|-----------------------|
| <b>Texture/mouthfeel: sticky</b>               |                                         | <input type="radio"/>         | No                                        | <input type="radio"/>                 | Yes                   |                       |                       |                       |                       |
| <input type="radio"/> Very little applicable   | <input type="radio"/> Hardly applicable | <input type="radio"/> Neither | <input type="radio"/> Slightly applicable | <input type="radio"/> Very applicable |                       |                       |                       |                       |                       |
| Now evaluate the overall liking for the sample |                                         |                               |                                           |                                       |                       |                       |                       |                       |                       |
| Dislike extremely                              | Dislike very much                       | Dislike moderately            | Dislike slightly                          | Neither Like nor Dislike              | Like slightly         | Like moderately       | Like very much        | Like extremely        |                       |
| <input type="radio"/>                          | <input type="radio"/>                   | <input type="radio"/>         | <input type="radio"/>                     | <input type="radio"/>                 | <input type="radio"/> | <input type="radio"/> | <input type="radio"/> | <input type="radio"/> | <input type="radio"/> |

**Please neutralize your senses with Matzen® and water!**

I can not taste the sample or only partially because:

### Product 3

Select all attributes from the list below that characterize the sample at hand.

If the attribute does not apply to the sample at hand, please tick **NO**.

If the attribute applies to the sample at hand, please check **YES** and rate on the scale how much it applies.

Please take a good look at the sample first before you evaluate this.

|                                              |                                         |                               |                                           |                                       |     |  |  |  |  |
|----------------------------------------------|-----------------------------------------|-------------------------------|-------------------------------------------|---------------------------------------|-----|--|--|--|--|
| <b>Appearance: red color</b>                 |                                         | <input type="radio"/>         | No                                        | <input type="radio"/>                 | Yes |  |  |  |  |
| <input type="radio"/> Very little applicable | <input type="radio"/> Hardly applicable | <input type="radio"/> Neither | <input type="radio"/> Slightly applicable | <input type="radio"/> Very applicable |     |  |  |  |  |
| <b>Appearance: glossy</b>                    |                                         | <input type="radio"/>         | No                                        | <input type="radio"/>                 | Yes |  |  |  |  |
| <input type="radio"/> Very little applicable | <input type="radio"/> Hardly applicable | <input type="radio"/> Neither | <input type="radio"/> Slightly applicable | <input type="radio"/> Very applicable |     |  |  |  |  |

Now please hold the sample about 2cm under your nose and sniff it at least 3 times

|                                              |                                         |                               |                                           |                                       |     |  |  |  |  |
|----------------------------------------------|-----------------------------------------|-------------------------------|-------------------------------------------|---------------------------------------|-----|--|--|--|--|
| <b>Odor: brothy/spicy</b>                    |                                         | <input type="radio"/>         | No                                        | <input type="radio"/>                 | Yes |  |  |  |  |
| <input type="radio"/> Very little applicable | <input type="radio"/> Hardly applicable | <input type="radio"/> Neither | <input type="radio"/> Slightly applicable | <input type="radio"/> Very applicable |     |  |  |  |  |
| <b>Odor: meaty</b>                           |                                         | <input type="radio"/>         | No                                        | <input type="radio"/>                 | Yes |  |  |  |  |
| <input type="radio"/> Very little applicable | <input type="radio"/> Hardly applicable | <input type="radio"/> Neither | <input type="radio"/> Slightly applicable | <input type="radio"/> Very applicable |     |  |  |  |  |
| <b>Odor: cereal</b>                          |                                         | <input type="radio"/>         | No                                        | <input type="radio"/>                 | Yes |  |  |  |  |
| <input type="radio"/> Very little applicable | <input type="radio"/> Hardly applicable | <input type="radio"/> Neither | <input type="radio"/> Slightly applicable | <input type="radio"/> Very applicable |     |  |  |  |  |
| <b>Odor: paprika</b>                         |                                         | <input type="radio"/>         | No                                        | <input type="radio"/>                 | Yes |  |  |  |  |
| <input type="radio"/> Very little applicable | <input type="radio"/> Hardly applicable | <input type="radio"/> Neither | <input type="radio"/> Slightly applicable | <input type="radio"/> Very applicable |     |  |  |  |  |

Please taste now the present sample and evaluate the following attributes.

|                                              |                                         |                               |                                           |                                       |     |  |  |  |  |
|----------------------------------------------|-----------------------------------------|-------------------------------|-------------------------------------------|---------------------------------------|-----|--|--|--|--|
| <b>Flavor: meaty</b>                         |                                         | <input type="radio"/>         | No                                        | <input type="radio"/>                 | Yes |  |  |  |  |
| <input type="radio"/> Very little applicable | <input type="radio"/> Hardly applicable | <input type="radio"/> Neither | <input type="radio"/> Slightly applicable | <input type="radio"/> Very applicable |     |  |  |  |  |
| <b>Flavor: cereal</b>                        |                                         | <input type="radio"/>         | No                                        | <input type="radio"/>                 | Yes |  |  |  |  |
| <input type="radio"/> Very little applicable | <input type="radio"/> Hardly applicable | <input type="radio"/> Neither | <input type="radio"/> Slightly applicable | <input type="radio"/> Very applicable |     |  |  |  |  |
| <b>Flavor: pepper</b>                        |                                         | <input type="radio"/>         | No                                        | <input type="radio"/>                 | Yes |  |  |  |  |
| <input type="radio"/> Very little applicable | <input type="radio"/> Hardly applicable | <input type="radio"/> Neither | <input type="radio"/> Slightly applicable | <input type="radio"/> Very applicable |     |  |  |  |  |
| <b>Flavor: salty</b>                         |                                         | <input type="radio"/>         | No                                        | <input type="radio"/>                 | Yes |  |  |  |  |
| <input type="radio"/> Very little applicable | <input type="radio"/> Hardly applicable | <input type="radio"/> Neither | <input type="radio"/> Slightly applicable | <input type="radio"/> Very applicable |     |  |  |  |  |
| <b>Flavor: sweet</b>                         |                                         | <input type="radio"/>         | No                                        | <input type="radio"/>                 | Yes |  |  |  |  |
| <input type="radio"/> Very little applicable | <input type="radio"/> Hardly applicable | <input type="radio"/> Neither | <input type="radio"/> Slightly applicable | <input type="radio"/> Very applicable |     |  |  |  |  |
| <b>Flavor: umami (savory, hearty)</b>        |                                         | <input type="radio"/>         | No                                        | <input type="radio"/>                 | Yes |  |  |  |  |

- |                                              |                                         |                               |                                           |                                       |
|----------------------------------------------|-----------------------------------------|-------------------------------|-------------------------------------------|---------------------------------------|
| <input type="radio"/> Very little applicable | <input type="radio"/> Hardly applicable | <input type="radio"/> Neither | <input type="radio"/> Slightly applicable | <input type="radio"/> Very applicable |
| <b>Texture/mouthfeel: firm</b>               | <input type="radio"/> No                | <input type="radio"/> Yes     |                                           |                                       |
| <input type="radio"/> Very little applicable | <input type="radio"/> Hardly applicable | <input type="radio"/> Neither | <input type="radio"/> Slightly applicable | <input type="radio"/> Very applicable |
| <b>Texture/mouthfeel: juicy, moist</b>       | <input type="radio"/> No                | <input type="radio"/> Yes     |                                           |                                       |
| <input type="radio"/> Very little applicable | <input type="radio"/> Hardly applicable | <input type="radio"/> Neither | <input type="radio"/> Slightly applicable | <input type="radio"/> Very applicable |
| <b>Texture/mouthfeel: gummy</b>              | <input type="radio"/> No                | <input type="radio"/> Yes     |                                           |                                       |
| <input type="radio"/> Very little applicable | <input type="radio"/> Hardly applicable | <input type="radio"/> Neither | <input type="radio"/> Slightly applicable | <input type="radio"/> Very applicable |

Now evaluate the overall liking for the sample

- |                       |                       |                       |                       |                             |                       |                       |                       |                       |
|-----------------------|-----------------------|-----------------------|-----------------------|-----------------------------|-----------------------|-----------------------|-----------------------|-----------------------|
| Dislike<br>extremely  | Dislike very<br>much  | Dislike<br>moderately | Dislike<br>slightly   | Neither Like<br>nor Dislike | Like slightly         | Like<br>moderately    | Like very<br>much     | Like<br>extremely     |
| <input type="radio"/>       | <input type="radio"/> | <input type="radio"/> | <input type="radio"/> | <input type="radio"/> |

**Please neutralize your senses with Matzen® and water!**

I can not taste the sample or only partially because:

**The sensory questions in the first part are identical to those in the second part, so they are not shown again here.**

**General note: The questionnaire is in the German language and is translated here.**
